# Supplementary material for: Computer-assisted navigation of anterior odontoid screw fixation for type II odontoid fracture: case report and practical positioning technique
Source: PubMed Central journal article supplement — J Spine Surg. 2024 Sep 12;10(3):590–6. doi: 10.21037/jss-24-46 (PMC11467271; doi:10.21037/jss-24-46), 2024-09-12
Supplement: jss-10-03-590-rc.pdf [file jss-10-03-590-rc.pdf]

## CARE Checklist of information to include when writing a case report

| Topic                            | Item No | Checklist item description                                                                                                                                                     | Reported on Page Number/Line Number | Reported on Section/Paragraph |
|----------------------------------|---------|--------------------------------------------------------------------------------------------------------------------------------------------------------------------------------|-------------------------------------|-------------------------------|
| Title                            | 1       | The diagnosis or intervention of primary focus followed by the words "case report"                                                                                             | Page 1/line 2                       | Title/NA                      |
| Key Words                        | 2       | 2 to 5 key words that identify diagnoses or interventions in this case report, including "case report"                                                                         | Page 3/Lines 56-57                  | Keywords/NA                   |
| Abstract<br>(Structured summary) | 3a      | Background: state what is known and unknown; why the case report is unique and what it adds to existing literature.                                                            | Page 2/Lines 32-37                  | Abstract/par. 1               |
|                                  | 3b      | Case Description: describe the patient's demographic details, main symptoms, history, important clinical findings, the main diagnosis, interventions, outcomes and follow-ups. | Page 2/Lines 39-45                  | Abstract/par. 2               |
|                                  | 3c      | Conclusions: summarize the main take-away lesson, clinical impact and potential implications.                                                                                  | Page 2/Lines 47-54                  | Abstract/par. 3               |
| Introduction                     | 4       | One or two paragraphs summarizing why this case is unique ( <b>may include references</b> )                                                                                    | Page 5/Lines 102107                 | Introduction/par. 4-5         |
| Patient Information              | 5a      | De-identified patient specific information                                                                                                                                     | Page 6/Line 110                     | Case presentation/Par. 1      |
|                                  | 5b      | Primary concerns and symptoms of the patient                                                                                                                                   | Page 6/Line 110-111                 | Case presentation/Par. 1      |
|                                  | 5c      | Medical, family, and psycho-social history including relevant genetic information                                                                                              | Not relevant                        | N/A                           |
|                                  | 5d      | Relevant past interventions with outcomes                                                                                                                                      | Not relevant                        | N/A                           |
| Clinical Findings                | 6       | Describe significant physical examination (PE) and important clinical findings                                                                                                 | Not relevant                        | N/A                           |
| Timeline                         | 7       | Historical and current information from this episode of care organized as a timeline                                                                                           | N/A                                 | N/A                           |
| Diagnostic Assessment            | 8a      | Diagnostic testing (such as PE, laboratory testing, imaging, surveys).                                                                                                         | Page 6/Lines 111113                 | Case presentation/par. 1      |
|                                  | 8b      | Diagnostic challenges (such as access to testing, financial, or cultural)                                                                                                      | Not relevant                        | N/A                           |
|                                  | 8c      | Diagnosis (including other diagnoses considered)                                                                                                                               | Page 6/Line 112                     | Case presentation/par. 1      |
|                                  | 8d      | Prognosis (such as staging in oncology) where applicable                                                                                                                       | Not relevant                        | N/A                           |

|                          |    |                                                                                            |                         |                          |
|--------------------------|----|--------------------------------------------------------------------------------------------|-------------------------|--------------------------|
| Therapeutic Intervention | 9a | Types of therapeutic intervention (such as pharmacologic, surgical, preventive, self-care) | Page 6/Lines 113114     | Case presentation/par. 1 |
|                          | 9b | Administration of therapeutic intervention (such as dosage, strength, duration)            | Pages 7-8/Lines 146-153 | Technique/par. 3         |

2-1

|  |    |                                                      |                     |                  |
|--|----|------------------------------------------------------|---------------------|------------------|
|  | 9c | Changes in therapeutic intervention (with rationale) | Page 7/Lines 127136 | Technique/par. 1 |
|--|----|------------------------------------------------------|---------------------|------------------|

2-1

|                        |     |                                                                                                        |                                         |                             |
|------------------------|-----|--------------------------------------------------------------------------------------------------------|-----------------------------------------|-----------------------------|
| Follow-up and Outcomes | 10a | Clinician and patient-assessed outcomes (if available)                                                 | Page 8/Lines 159161                     | Technique/par. 4            |
|                        | 10b | Important follow-up diagnostic and other test results                                                  | Page 8/Lines 159161                     | Technique/par. 4            |
|                        | 10c | Intervention adherence and tolerability (How was this assessed?)                                       | Not relevant                            | N/A                         |
|                        | 10d | Adverse and unanticipated events                                                                       | Not relevant                            | N/A                         |
| Discussion             | 11a | A scientific discussion of the strengths AND limitations associated with this case report              | Page 8-9/Lines 164184                   | Discussion/par. 1-2         |
|                        | 11b | Discussion of the relevant medical literature <b>with references</b>                                   | Page 9-10/Lines 186-202                 | Discussion/par. 3-4         |
|                        | 11c | The scientific rationale for any conclusions (including assessment of possible causes)                 | Page 10-11/Lines 204-221                | Discussion/par. 5           |
|                        | 11d | The primary "take-away" lessons of this case report (without references) in a one paragraph conclusion | Page 11/Lines 230234                    | Conclusion/par. 1           |
| Patient Perspective    | 12  | The patient should share their perspective in one to two paragraphs on the treatment(s) they received  | N/A                                     | N/A                         |
| Informed Consent       | 13  | Did the patient give informed consent? Please provide if requested                                     | Yes <input checked="" type="checkbox"/> | No <input type="checkbox"/> |

Article information: <https://dx.doi.org/10.21037/jss-24-46>

\*As the checklist was provided upon initial submission, the page number/line number reported may be changed due to copyediting and may not be referable in the published version. In this case, the section/paragraph may be used as an alternative reference.

Updated on January 26, 2022
